# Supplementary material
Source: PubMed Central journal article supplement (PMC2952209)
Supplement: supp_M110.130435_Supplementary-fourth.pdf [file supp_M110.130435_Supplementary-fourth.pdf]

## Supplemental Materials

for

### ROLE OF H-1 AND H-2 SUBUNITS OF SOYBEAN SEED FERRITIN IN OXIDATIVE DEPOSITION OF IRON IN PROTEIN

Jianjun Deng<sup>+||</sup>, Xiayun Liao<sup>+||</sup>, Haixia Yang<sup>+||</sup>, Zichun Hua<sup>‡</sup>, Taro Masuda<sup>§\*</sup>, Fumiyuki

Goto<sup>‡</sup>, Toshihiro Yoshihara<sup>‡</sup>, Guanghua Zhao<sup>+\*</sup>

From <sup>+</sup>CAU & ACC Joint-Laboratory of Space Food, College of Food Science & Nutritional Engineering, China Agricultural University, Beijing 100083, China,

<sup>§</sup>Laboratory of Food Quality Design and Development, Division of Agronomy and Horticultural Science, Graduate School of Agriculture, Kyoto University, Gokasho,

Uji, Kyoto 611-0011, Japan, <sup>‡</sup>The State Key Laboratory of Pharmaceutical

Biotechnology and Department of Biochemistry, College of Life Sciences, Nanjing University, Nanjing 210093, P. R. China, <sup>‡</sup>Biotechnology Sector, Environmental

Science Research Laboratory, Central Research Institute of Electric Power Industry, 1646 Abiko, Abiko, Chiba 270-1194, Japan

\*Address correspondence to: Dr. Taro Masuda, Tel.: 81-774-38-3762; Fax: 81-774-38-3761; E-mail: [masutaro@kais.kyoto-u.ac.jp](mailto:masutaro@kais.kyoto-u.ac.jp); Dr. Guanghua Zhao,

Tel.:86-10-62737761; Fax:86-10-62737761; E-mail:gzhao1000@yahoo.com. <sup>||</sup>These authors contributed equally to the work.

FIGURE S1. Mass distributions of different particle sizes of aporH-2 and aporH-2 plus 96 or 144 Fe<sup>2+</sup>/shell. The same experimental conditions as used in Figure 1C.

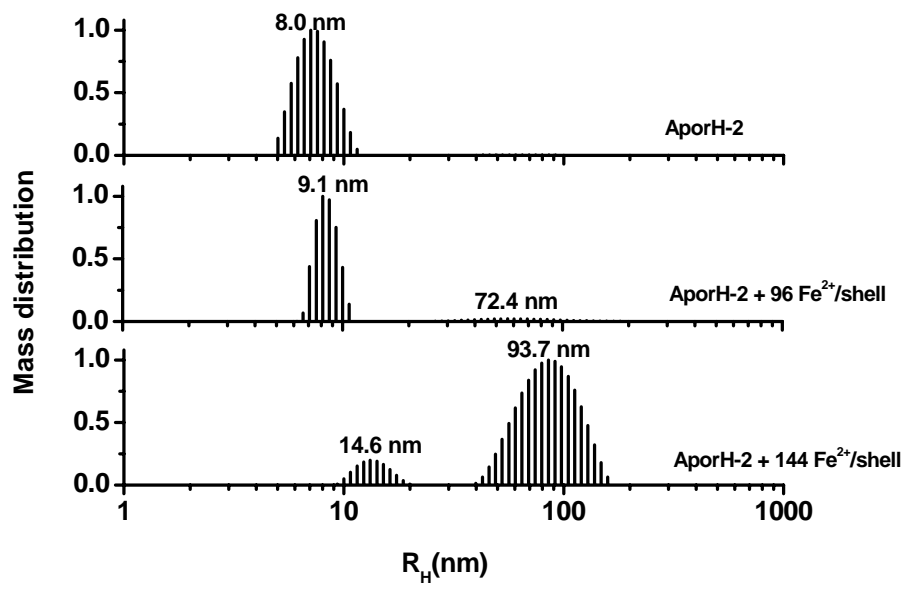

FIGURE S2. Mass distributions of different particle sizes of aporH-1 and aporH-1 plus 200 or 400 Fe<sup>2+</sup>/shell. The same experimental conditions as used in Figure 2C.

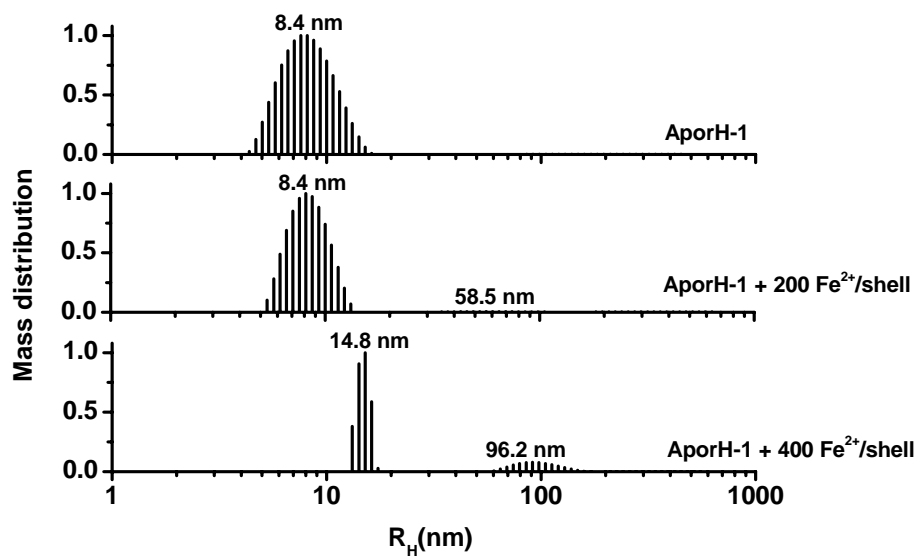

FIGURE S3. Mass distributions of different particle sizes of apoSSF and apoSSF plus 96 or 144 Fe<sup>2+</sup>/shell. The same experimental conditions as used in Figure 4C.

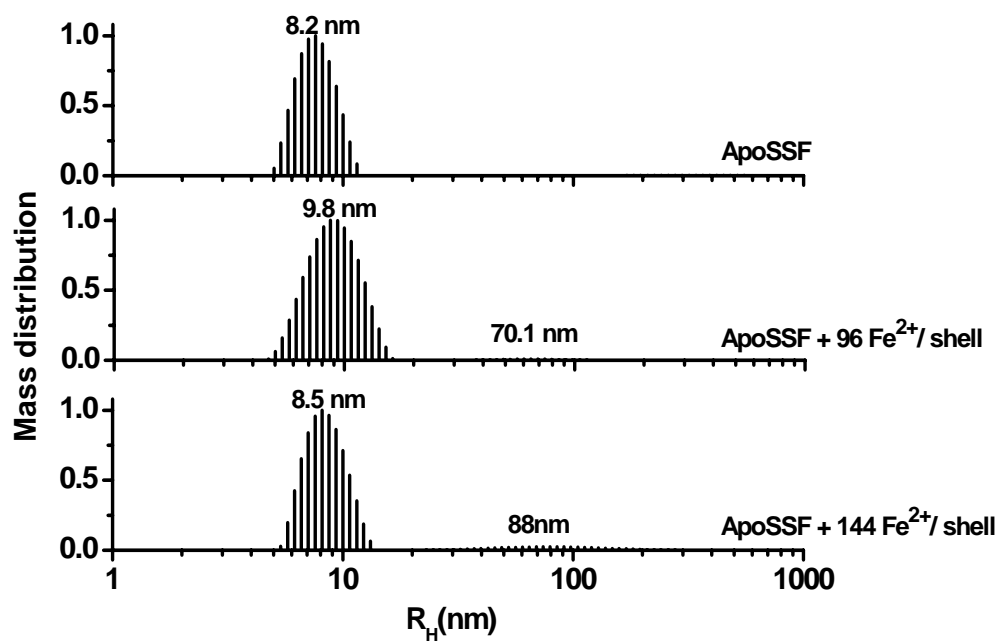

FIGURE S4 (A) Kinetic traces of the rH-1H-2 aggregation during  $\text{Fe}^{2+}$  oxidation. (B) Time course of the rH-1H-2 aggregation upon addition of  $\text{Fe}^{2+}$  or  $\text{Fe}^{3+}$ . The curve represents an average of four experimental measurements. Conditions:  $[\text{rH-1H-2}] = 0.5 \mu\text{M}$  in 100 mM Mops (pH 7.0), 24 – 100  $\mu\text{M}$   $\text{FeSO}_4$ , 25 °C.

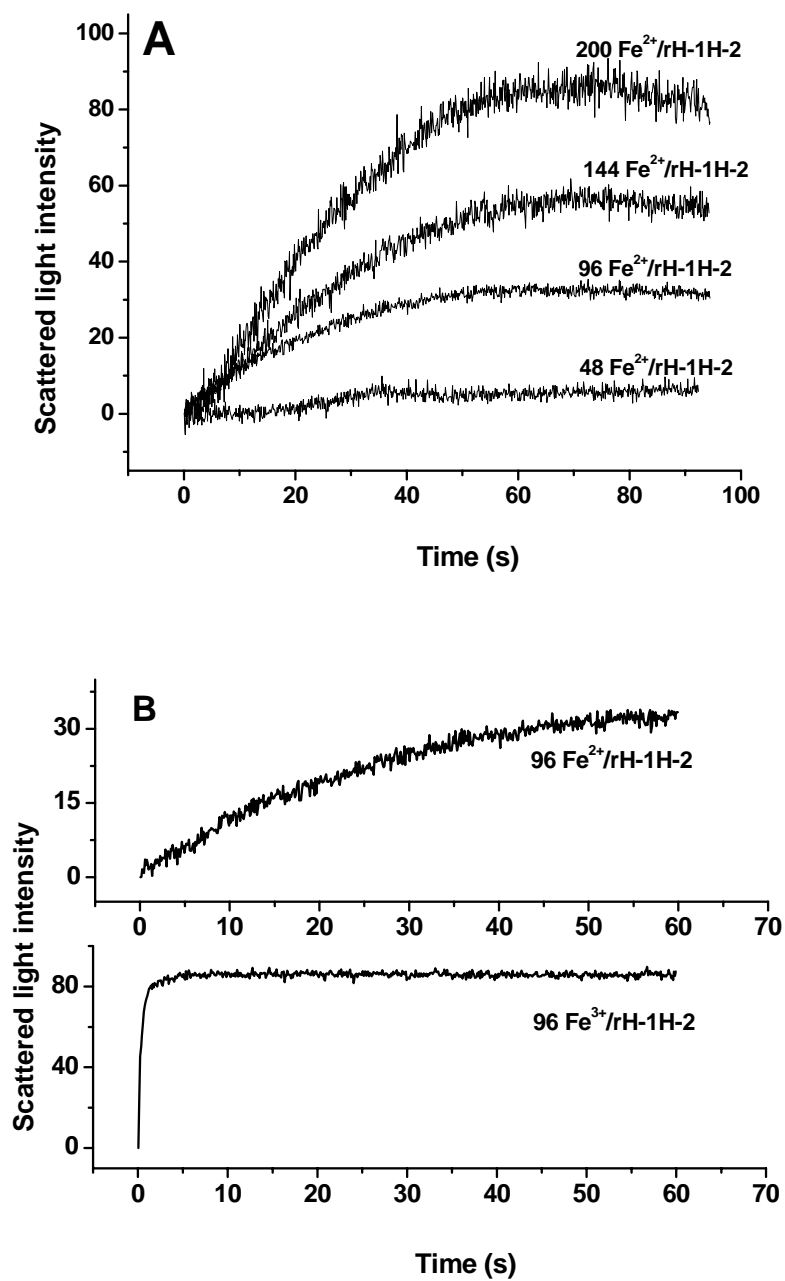

FIGURE S5 Relative scattered light intensity showing different particle size distributions induced by aerobic addition of  $\text{Fe}^{2+}$  to AporH-1 (A), AporH-2 (B) and ApoSSF (C) at different times. Conditions: 0.5  $\mu\text{M}$  Apoferritin in 0.1 M Mops (pH 7.0), 200  $\mu\text{M}$   $\text{Fe}^{2+}$ , 25  $^{\circ}\text{C}$ .

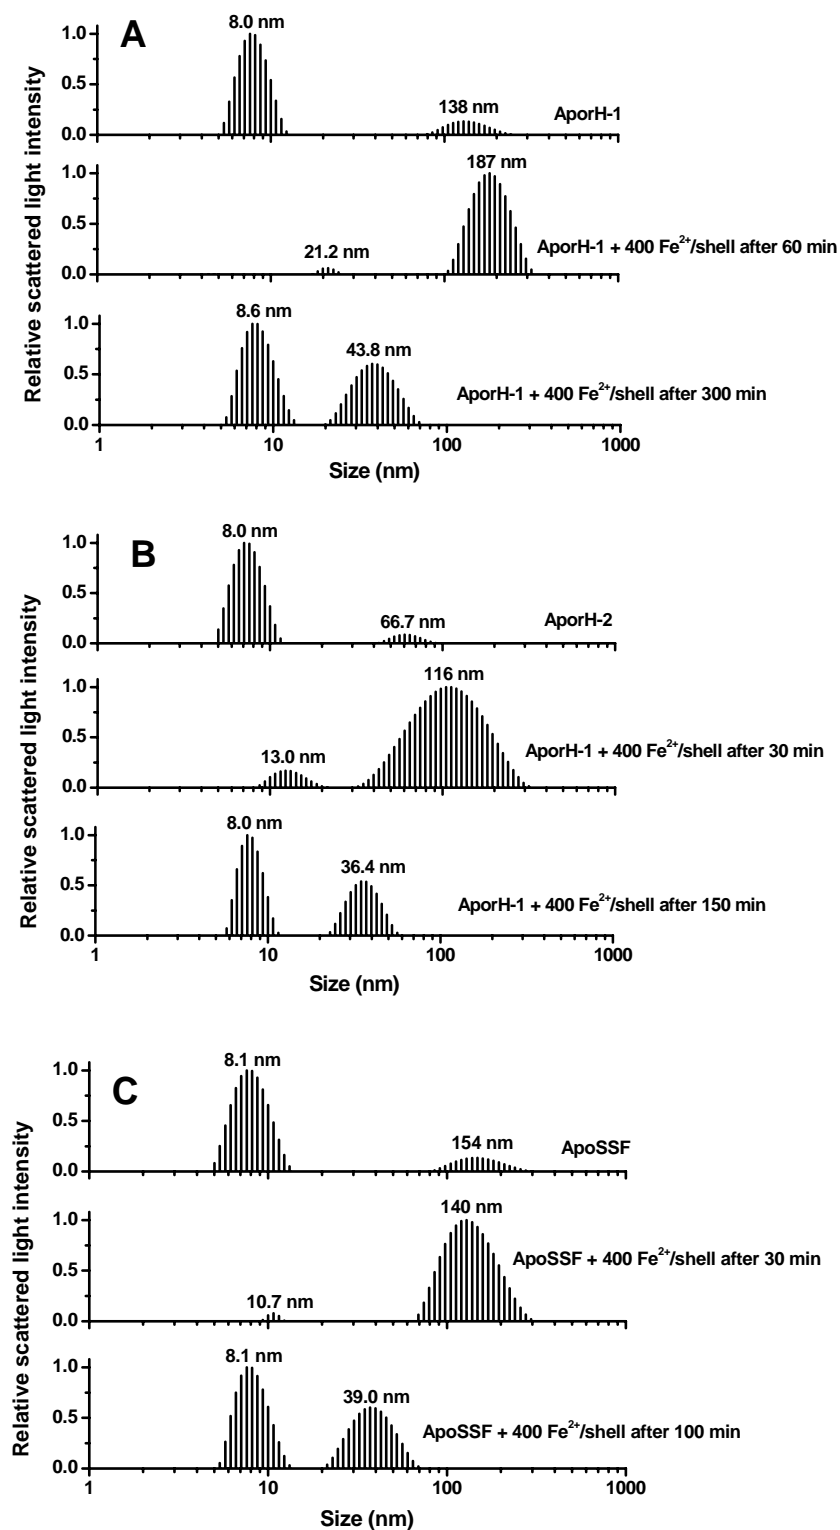

Table S1 Dynamic light scattering results from Figure S1 showing mass distributions of different particle sizes of aporH-2 and aporH-2 plus 96 or 144 Fe<sup>2+</sup>/shell under the same experimental conditions as used in Figure 1C.

| Sample (pH 7.0)                | R <sub>h</sub> (nm) | % Area <sup>a</sup> | Apparent Mr (kDa) <sup>b</sup> | Approx no. of monomers <sup>c</sup> |
|--------------------------------|---------------------|---------------------|--------------------------------|-------------------------------------|
| AporH-2                        | 8.0 ± 1.2           | 99.9 ± 1.1          | 454 ± 106                      | 1 ± 0.2                             |
|                                | 66.7 ± 2.8          | 0.1 ± 0.1           | 671,000 ± 42,000               | 1342 ± 84                           |
| AporH-2 + 96 Fe <sup>2+</sup>  | 9.1 ± 1.1           | 64.0 ± 1.2          | 609 ± 110                      | 1 ± 0.2                             |
|                                | 72.4 ± 3.3          | 36.0 ± 2.2          | 81,900 ± 8,100                 | 164 ± 16                            |
| AporH-2 + 144 Fe <sup>2+</sup> | 14.6 ± 1.5          | 1.7 ± 0.4           | 1869 ± 230                     | 4 ± 0.5                             |
|                                | 93.7 ± 3.8          | 98.3 ± 2.5          | 151,000 ± 9,100                | 302 ± 18                            |

<sup>a</sup>Percent area under each of the peaks in the mass distribution curve of Figure S1 corresponding to the percentage of species present.

<sup>b</sup>Spherical geometry is assumed.

<sup>c</sup>Estimated number of monomeric rH-2 molecules that constitute the aggregate. A monomer molecular weight of ~ 500 is assumed.

Table S2 Dynamic light scattering results from Figure S2 showing mass distributions of different particle sizes of apo rH-1 and rH-1 plus 200 or 400 Fe<sup>2+</sup>/shell under the same experimental conditions as used in Figure 2C.

| Sample (pH 7.0)                | R <sub>h</sub> (nm) | % Area <sup>a</sup> | Apparent Mr (kDa) <sup>b</sup> | Approx no. of monomers <sup>c</sup> |
|--------------------------------|---------------------|---------------------|--------------------------------|-------------------------------------|
| AporH-1                        | 8.4 ± 1.1           | 99.8 ± 0.9          | 501 ± 120                      | 1 ± 0.2                             |
|                                | 195.9 ± 4.8         | 0.2 ± 0.1           | 861,000 ± 25,000               | 1772 ± 50                           |
| AporH-1 + 200 Fe <sup>2+</sup> | 8.4 ± 1.2           | 95.7 ± 2.3          | 512 ± 110                      | 1 ± 0.2                             |
|                                | 58.5 ± 3.1          | 3.8 ± 1.1           | 49,600 ± 8,200                 | 99 ± 16                             |
| AporH-1 + 400 Fe <sup>2+</sup> | 341.1 ± 8.4         | 0.5 ± 0.1           | 3,190,000 ± 95,000             | 6380 ± 190                          |
|                                | 14.8 ± 2.2          | 41.0 ± 1.7          | 1928 ± 430                     | 4 ± 0.8                             |
|                                | 96.2 ± 3.7          | 57.3 ± 1.2          | 160,000 ± 14,000               | 320 ± 28                            |
|                                | 355.8 ± 6.8         | 1.7 ± 0.1           | 3,530,000 ± 67,000             | 7060 ± 134                          |

<sup>a</sup>Percent area under each of the peaks in the mass distribution curve of Figure S2 corresponding to the percentage of species present.

<sup>b</sup>Spherical geometry is assumed.

<sup>c</sup>Estimated number of monomeric rH-1 molecules that constitute the aggregate. A monomer molecular weight of ~ 500 is assumed.



Table S3 Dynamic light scattering results from Figure S3 showing mass distributions of different particle sizes of apoSSF and apoSSF plus 96 or 144 Fe<sup>2+</sup>/shell under the same experimental conditions as used in Figure 4C.

| Sample (pH 7.0)               | R <sub>h</sub> (nm) | % Area     | Apparent Mr (kDa)  | Approx no. of monomers |
|-------------------------------|---------------------|------------|--------------------|------------------------|
| ApoSSF                        | 8.3 ± 1.4           | 100 ± 0.7  | 484 ± 108          | 1 ± 0.2                |
|                               | 328.8 ± 4.2         | 0 ± 0.2    | 2,930,000 ± 87,000 | 5860 ± 184             |
| ApoSSF + 96 Fe <sup>2+</sup>  | 9.8 ± 1.1           | 94.5 ± 1.3 | 730 ± 140          | 1 ± 0.3                |
|                               | 70.1 ± 2.5          | 5.5 ± 0.4  | 75,800 ± 4,900     | 152 ± 10               |
| ApoSSF + 144 Fe <sup>2+</sup> | 8.5 ± 1.1           | 61.8 ± 1.2 | 519 ± 110          | 1 ± 0.2                |
|                               | 88.0 ± 3.4          | 38.2 ± 1.5 | 130,000 ± 6,800    | 260 ± 14               |

<sup>a</sup>Percent area under each of the peaks in the mass distribution curve of Figure S3 corresponding to the percentage of species present.

<sup>b</sup>Spherical geometry is assumed.

<sup>c</sup>Estimated number of monomeric SSF molecules that constitute the aggregate. A monomer molecular weight of ~ 500 is assumed.
